# Supplementary material for: Ginkgotides: Proline-Rich Hevein-Like Peptides from Gymnosperm Ginkgo biloba
Source: Front Plant Sci. 2016 Nov 3;7:1639. doi: 10.3389/fpls.2016.01639 (PMC5093130; doi:10.3389/fpls.2016.01639)
Supplement: Supplementary file 2 [file Data_Sheet_2.xlsx]

## Sheet: Sheet1
Accession number	Species	Order	Family	Signal peptide	Mature domain	C-terminal domain
IAJW-2003903	Athrotaxis cupressoides	Pinales	Cupressaceae	MALNKVSIVVLVAIVFLMGNVGVMA	DPTCSPSGNFWCNNGRCCSIYNWCGSGAAYCAKGNCLAQCWPKA	AALNQSSLNLSQQNLTSPSP
IAJW-2003902	Athrotaxis cupressoides	Pinales	Cupressaceae	MALNKVSIVVLVAIVFLMGNVGVMA	DPTCSPSGNFWCNNGRCCSIYNWCGSGAAYCAKGNCLAQCWPG	VTAVTTYSLTQRNLTSTKTNNP
IAJW-2018454	Athrotaxis cupressoides	Pinales	Cupressaceae	MRDVPNFMTNRKYGGEKIKIALYMLLVLMASVMVKG	DPTCSPAGNFWCNSGRCCSIYNWCGSTSDYCASGNCLAQCWPKA	AALNQSSLNLSQQNLTSPSP
YYPE-2008942	Austrocedrus chilensis	Pinales	Cupressaceae	MADRRLRLGLHILLVMMVIVEKVNG	DPTCSPAGNFLCNTGRCCSQYNWCGSTSDYCASGNCLAQCWPNA	VALNQSTLQVAKKNLTSNSSP
BTTS-2007338	Austrotaxus spicata	Pinales	Taxaceae	MIMGEYKCKIRSVTAVSVIIMLITIFVATEMEMVMA	DPTCSPRGNFFCNSGRCCSKFNWCGSGAQYCAKGNCIAQCWPG	VSALTKYSYTQILAGRNLTGSATVNNP
IFLI-2000417	Callitris gracilis	Pinales	Cupressaceae	MAFTSSSVAMMVMILGLLLVMVKS	DPTCSPAGGFWCNIGRCCSIYNWCGSTWEYCAPGNCLAQCWPYS	RPLNHSSFHHPPHNRSTTSP
RMMV-2004820	Callitris macleayana	Pinales	Cupressaceae	MQILAERADMAPNKLRIGLYVLLVLVIVQING	DPTCSPAGNFLCNSGRCCSIYNWCGDTSDYCAAGNCLAQCWPNQLA	LNQSALNLAQRNITSSSP
RMMV-2002319	Callitris macleayana	Pinales	Cupressaceae	MVMNKLCMGIIILLALVGLKVKG	DPTCSPAGSFLCNSGRCCSKYNWCGSTSDYCASGSCLAQCWPNA	VALNQSALHVAKQNLTSSSP
GKCZ-2070649	Diselma archeri	Pinales	Cupressaceae	MAYKSSSLAVLMILGLMLIRAKS	DPTCSPAGNFWCNSGRCCSIYNWCGSTSDYCAPWNCLAQCWPYA	VALNQSSLNLSQHNRSSTSP
GKCZ-2068869	Diselma archeri	Pinales	Cupressaceae	MTDSRLRLGLHILLVLMVIVQTVNG	DPTCSPAGNFWCDSGRCCSIYNWCGDTSDYCASGNCLAQCWPDA	VALNQSTLSVSQNNLTLSS
UEVI-2055533	Fokienia hodginsii	Pinales	Cupressaceae	MAESRLRLALYTLLVLMAVTVNG	DPTCSPAGNFWCDSGRCCSIYNWCGSISDYCASGNCLAQCWPDA	AALNQSSLTVFRQNLTSVSP
OWFC-2045614	Halocarpus bidwillii	Pinales	Podocarpaceae	MKMEKMRLMALLMMLAMAMMMMMVVVEG	DPSCNPAAKIYCNPGRCCSKFNWCGTLTSYCGKDYCIAQCPPG	VSPLSHSQIHLSIANLTTTKPQAHVHNTP
XMGP-2055217	Juniperus scopulorum	Pinales	Cupressaceae	MAERRLRWALCMFFVLMAVVVING	DPTCSPAGNFLCNSGRCCSKYNWCGSTSDYCASGNCLAQCWPNA	LALNQSTLINVSMERNITSASP
NRXL-2011387	Metasequoia glyptostroboides	Pinales	Cupressaceae	MAQSRLRLALYILLVLMAVTVKG	DPTCSPAGNFWCDSGRCCSIYNRCGSTSDYCASGNCLAQCWPNA	VALNQSSLNLSQQNLTSASP
XQSG-2043244	Microbiota decussata	Pinales	Cupressaceae	MAEIRLRMGVDMLLVLIVAVMVING	DPTCSPAGNFWCDSGRCCSIYNWCGSTADYCASGNCLAQCWPNA	LRLNQSTLIEVSQKNITSVSP
BBDD-2071547	Microstrobos fitzgeraldii	Pinales	Podocarpaceae	MEKVRLMAVLMVLLMAMTMMVEG	DPSCSPTVTGRISCNSGRCCSKFNWCGTGVSYCGKDYCVAQCPPRIS	PLPQSQSVASITNLTVHSTP
JDQB-2064704	Neocallitropsis pancheri	Pinales	Cupressaceae	MASKSSSLAVLVMILGLMLIRVKS	DPTCSPAGRFWCNSGRCCSIYNWCGSTWEYCAPGNCLAQCWPYS	RPLNHSSSHLSPHNRSSTSP
OVIJ-2005727	Papuacedrus papuana	Pinales	Cupressaceae	MAEKRLRLALYMILGLMLIRVRT	DPTCSPAGNFWCKSGRCCSIYNWCGSTSDYCAPGNCLAQCWPYIA	GLNQSCLNVSPHNSSSASP
OVIJ-2005726	Papuacedrus papuana	Pinales	Cupressaceae	MAENKLRMGLYILLVLLLIVKIYG	DPTCSPAGNFWCNSGRCCSIYNWCGSTSDYCASGNCLAQCWPDA	VALNQSSLQVAKQNITSNSSP
JZVE-2002557	Parasitaxus usta	Pinales	Podocarpaceae	MKMERAKIVAFVMVLAMAMTMMIMVEG	DPTCSPAGRQYCNDGRCCSKFNWCGTGAAYCSKGNCIAQCPPG	VSPLSLSQSLLSIANHTAQP
JZVE-2002559	Parasitaxus usta	Pinales	Podocarpaceae	MKMERAKLVAFVMVLAVAMSMTIMVEG	DPTCSPAGRQYCNKGRCCSKFNWCGTGAAYCSKGNCIAQCPPG	VSPLSLSQSLLSIANHTAQP
BUWV-2045303	Platycladus orientalis	Pinales	Cupressaceae	MRIKIRMADSRSRMGLYILLVFMTVNIHG	DPTCSPAGNFWCNSGRCCSVYNWCGSTSDYCASGNCLAQCWPNA	VALNQSTLISVSQKNITSVSP
SCEB-2044852	Podocarpus coriaceus	Pinales	Podocarpaceae	MEKIRVMALVMVLAIAMTMMVEG	DPSCSPAGRQYCNDGRCCSKFNWCGTGPAYCSKGNCIGQCPPG	VSPLPLAQIIPSIANLTTQPEAHHPNP
EGLZ-2034459	Prumnopitys andina	Pinales	Podocarpaceae	MEKISLMVFVMVLAMMMMVEG	DPSCNPAGKIYCNPGRCCSKFNWCGTLESYCGKNYCIAQCPPG	VSPLSPSQILLSIANLTAQPQAHVDLNP
GOWD-2075409	Sphagnum lescurii	Sphagnales	Sphagnaceae	MGQYKSTVAALLVIIMFLGCNIGLPMVMG	DPTCSPKGNFFCNSGRCCSVYNWCGSGASYCAKGNCLAQCWPG	VTAVTTYTLTGKNLTSTHNN
KAWQ-2005435	Stangeria eriopus	Cycadales	Stangeriaceae	MEYKNLVCVVLVLAVVIGESSVSVKG	DPTCSPAGQVYCNSGRCCSKFNWCGSTAAYCQRPNCIAQCWPG	VTALTLSESLLSLSNYTSEAATMAAENNNP
KLGF-2006233	Sundacarpus amarus	Pinales	Podocarpaceae	MEKISMMALVMVLAXEG	DPSCNPMAKVYCNPGRCCSKFNWCGTLESYCGKNYCIAQCPTG	ISPLSPSQILLSTANLTAQTQVHVDPNP
FHST-2004844	Taxodium distichum	Pinales	Cupressaceae	MAESRFRLALYILLVLMAVVVNVKG	DPTCSPAGNFWCNSGRCCSIYNWCGNTSDYCASGNCLAQCWPNA	VALDQSNLSVSRQNLTSAFP
FHST-2061111	Taxodium distichum	Pinales	Cupressaceae	MTENRSRLAVYMLLVLMAVMVNVKG	DPTCSPAGNFWCNSGRCCSIYNWCGSTSDYCAFGNCLAQCWPNVLA	LNQSSLSAVQHNLTSASP
FHST-2007221	Taxodium distichum	Pinales	Cupressaceae	MRMSRLTYAICMLLVLMAVMLKVKVKG	DPTCSPAGNFWCDSGRCCSIYNWCGSTSDYCASGNCLAQCWPYA	VALNESSLNLSQQNLTSALHGNP
HQOM-2011118	Torreya taxifolia	Pinales	Cephalotaxaceae	MKMALYKLSVTVLIMLMFTGMAMA	DPTCSPAGNFFCNNGRCCSKFNWCGSGAQYCGKGNCIAQCPPS	VTALTRYSLSGKNLTSANP
UUJS-2000623	Nageia nagi	Pinales	Podocarpaceae	MEKIRVMALVMVLAMAMTIMVEG	DPTCSPAGRQYCNAGRCCSKFNWCGTGPAYCGKGNCIAQCPPRVS	PLSLSQIIPSVSNLTAQPQAHHPNP
ETCJ-2001405	Pilgerodendron uviferum	Pinales	Cupressaceae	MAAIRLRLGLHMLLILMAVMVKVKG	DPTCSPAGNFWCDSGRCCSIYNWCGSTSDYCASGNCLAQCWPNTLPLNQS	TLTVAQNNLTSPSP
EFMS-2069914	Torreya taxifolia	Pinales	Cephalotaxaceae	MAEKRLRLAFSVLVFMAVKGLA	DPTCSPAGNFWCNSGRCCSIYNWCGSTAEYCAQGNCLAQCWPS	ASALDRYQYGLNLLNQQNLTTSPLNNP
EFMS-2012045	Torreya nucifera	Pinales	Cephalotaxaceae	MALYKLSVTVLVMLMLTVMGMVMA	DPTCSPSGNFFCNDGRCCSRFNWCGTGPQYCGKGNCIAQCPPS	VTALTSYSLSGKNLTSANP
AUDE-2002285	Widdringtonia cedarbergensis	Pinales	Cupressaceae	MKDSKLRLRLHISIILMVVGQTVNG	DPTCSPAGNFWCDSGRCCSIYNWCGDTSDYCASENCLAQCWPNA	AALNQSTMNVAQNNLTSLSP
IAJW-2003902	Amentotaxus argotaenia	Pinales	Taxaceae	MLMFTAMLRVMA	DPTCSPAGNFFCNNGRCCSRFNWCGTGPSYCGRGNCIAQCPPA	VTALTSYSFSAKNLTSANP
IIOL-2071721	Pinus parviflora	Pinales	Pinaceae	MALYKLSVTVLVMLMFTAMLRVMA	DPTCSPAGNFFCNNGRCCSRFNWCGTGPSYCGRGNCIAQCPPA	VTALTSYSFSAKNLTSANP
YLPM-2076469	Pseudotaxus chienii	Pinales	Taxaceae	MAENRLRLAFYMLVLMAVMVEG	DPTCSPAGNFWCNTGRCCSIYNWCGSTAAYCAQGNCLAQCWPTVA	ALNNSSLTLLQQRNLTSIHQNNP
WWSS-2001213	Taxus baccata	Pinales	Taxaceae	MAENKLRLAFYMLMLMTVMVEG	DPTCSPAGNFWCNTGRCCSIYNWCGSTAAYCAQGNCLAQCWPTVA	AVDNSSFSLLQHQNLTSTHNP
FRPM-2000448	Calocedrus decurrens	Pinales	Cupressaceae	MAYKISSLPLHMLLVLLVLMNVKG	DPTCSPAGNFWCNSGRCCSIYNWCGSTSDYCASGNCLAQCWPNA	LALANHSSCLNVISHRNRTSAPAP
OUOI-2010547	Cunninghamia lanceolata	Pinales	Cupressaceae	MPESRLRSAVYVLLVLMAVMVKVKVKG	DPTCSPAGNFWCNSGRCCSIYNWCGSTSDYCASGNCLAQCWPNA	VALNQYTFNLTQQNLTSAP
QNGJ-2067220	Cupressus dupreziana	Pinales	Cupressaceae	MAYKISTLTLHMLLLLMINVKG	DPTCSPAGNFWCNSGRCCSIYNWCGSTSDYCASGNCLAQCWPNA	ISFVNHSSCLNVIISHHNRTSPSP
BUWV-2044272	Platycladus orientalis	Pinales	Cupressaceae	MAYKIVSLALYMLLMLMNVKG	DPTCSPAGNFWCNSGRCCSIYNWCGSTSDYCASGNCLAQCWPNA	LSLLNHSSCLNVIPNHNRSSVPSP
QFAE-2000264	Sequoiadendron giganteum	Pinales	Cupressaceae	MAESRLRLALHMLIVLMTVTVKG	DPTCSPAGNFWCNSGRCCSIYNWCGSTSDYCASGNCLAQCWPNA	AALNQSSLNVSERNLTSGSP
QSNJ-2000100	Taiwania cryptomerioides	Pinales	Cupressaceae	MVESRLRLPLHILLVLMTVEVRVRG	DPTCSPAGNFWCNSGRCCSIYNWCGSTSDYCASGNCLAQCWPNA	VALNQYTFNTSQLNLTSASP
IHCQ-2093561	Crossopetalum rhacoma	Rosids	Celastraceae	MMALAMAMTMMVEA	DPSCSPAGRQYCNDGRCCSKFNWCGTGAAYCGKGNCIGQCPPRVS	PLPLSQITLSITNHTTKTQAHHPNP
HXJE-2113249	Serenoa repens	Arecales	Arecaceae	MDKIRVMVLMMALAMAMTMMVEA	DPSCSPAGRQYCNDGRCCSKFNWCGTGAAYCGKGNCIGQCPPRVS	PLPLSQITLSITNHTTKTQAHHPNP
QNGJ-2067951	Cupressus dupreziana	Pinales	Cupressaceae	MAERRIRWALCMLFVLMAVVVING	DPTCSPAGNFWCNSGRCCSQYNWCGSTSDYCASGNCLAQCWPNA	MALNQSSLINVSMKKNITSASP
UEVI-2008402	Fokienia hodginsii	Pinales	Cupressaceae	MAESRLRWTLYTLLVLMAVMVKVNG	DPTCSPAGNFWCNSGRCCSQYNWCGSTSDYCASGNCLAQCWPNA	LALNQYSSNVSHQNITSLSP
JZVE-2002558	Parasitaxus usta	Pinales	Podocarpaceae	MERAKIVAFVMVLAVAMTMMIMVEG	DPTCSPAGRVYCNPGRCCSKFNWCGTTRANCGKGNCIAQCHPA	VSPLSLYQAFLSITNHTAQP
VGSX-2061426	Retrophyllum minus	Pinales	Podocarpaceae	MERAKIVAFVMVLAMAMTMMIMVEG	DPTCSPAGRVYCNPGRCCSKFNWCGTTRANCGKGNCIAQCHPA	VSPLSLYQAFLSITNHTAQ
the colour filled rows represent peptides that expreseed in different plants, with the same mature domain, but different signal peptide and/or C-terminal tail
